# Supplementary material
Source: HighWire-hosted journal article supplement (https://jcp.bmj.com/content/74/5/307)
Supplement: inline-supplementary-material-2 [file inline-supplementary-material-2.xlsx]

## Sheet: Sheet1
	Supplemental Table 2: Summary of deleteriousness prediction methods used in our study
	Name	Category	Score used for analysis	Deleterious threshold
	SIFT	Function prediction	Score	<0.05
	SIFT4G	Function prediction	Score	<0.05
	Polyphen2_HDIV	Function prediction	Score	>0.5
	Polyphen2_HVAR	Function prediction	Score	>0.5
	LRT	Function prediction	Score * 0.5 (if Omega ≥1) or 1 − Score * 0.5 (if Omega <1)	P
	MutationTaster	Function prediction	Score (if A or D) or 1 − Score (if N or P)	>0.5
	MutationAssessor	Function prediction	(Score-Min)/(Max − Min)	>0.65
	FATHMM	Function prediction	1 − (Score-Min)/(Max − Min)	≥0.45
	PROVEAN	Function prediction	Score	<= -2.5
	VEST4	Function prediction	Score	>0.5
	MetaSVM	Function prediction	Score	>0
	MetaLR	Function prediction	Score	>0.5
	M-CAP	Function prediction	Score	>0.025
	REVEL	Function prediction	Score	>0.5
	MutPred	Function prediction	Score	>0.5
	MVP	Function prediction	Score	0.7 and 0.75
	MPC	Function prediction	Score	>1
	PrimateAI	Function prediction	Score	>0.0803
	DEOGEN2	Function prediction	Score	>0.5
	CADD_phred	Function prediction	Score	>20
	DANN	Function prediction	Score	>0.5
	fathmm-MKL_coding	Function prediction	Score	>0.5
	GenoCanyon	Function prediction	Score	>1
	GERP++_RS	Conservation score	Score
	phyloP100way_vertebrate	Conservation score	Score
	phastCons100way_vertebrate	Conservation score	Score
